# Supplementary material
Source: publisher figshare collection journal article supplement (https://rs.figshare.com/ndownloader/files/13533698)
Supplement: Supplementary file 1 [file 13533698]

## Sheet: Sheet1
Supplementary Material File S3 for article in Biology Letters:
Intrinsic pre-zygotic reproductive isolation of distantly related pea aphid host races
Varvara Fazalova1*, Bruno Nevado2, Ailsa McLean1 and H. Charles J. Godfray1
*Corresponding author
1Department of Zoology, University of Oxford,
2Department of Plant Sciences, University of Oxford
File S3. Number of crosses performed for each genotype, with the number of observed copulations which occurred during the 90-min observation period shown in brackets.
Letter-number codes correspond to different aphid clones.
		MALES
		V. cracca			M.lupulina			L. pratensis
FEMALES		V4-68a	V5-67a	V6-56b	M4-58a	M5-54a	M6-24a	L4-70a	L5-63a	L6-62a
V. cracca	V1-60c	5(1)	3(3)	3(2)	4(1)	5(3)	3(2)	6(5)	4(2)	4(3)
	V2-66a	3(2)	1(1)	4(3)	5(0)	6(1)	5(1)	5(3)	4(0)	5(1)
	V3-65a	1(1)	1(0)	1(1)	4(3)	3(3)	3(2)	6(4)	4(2)	4(0)
M.lupulina	M1-55b	4(2)	4(3)	4(4)	4(1)	0(0)	0(0)	4(2)	3(0)	3(0)
	M2-05b	2(1)	3(3)	3(1)	0(0)	4(4)	0(0)	2(2)	2(1)	2(0)
	M3-03b	5(2)	5(3)	6(1)	3(1)	1(0)	4(0)	7(4)	5(0)	4(2)
L. pratensis	L1-29d	5(3)	3(3)	3(2)	4(3)	5(3)	3(1)	5(4)	3(0)	4(1)
	L2-64b	6(2)	2(2)	4(3)	6(5)	6(3)	5(1)	2(0)	2(0)	3(1)
	L3-61b	4(4)	5(3)	5(3)	6(2)	4(1)	6(3)	3(1)	2(2)	4(0)
			crosses between closely related host races
			crosses between distanly related host races
			crosses within host races
